# Supplementary material for: Cultivar and Metal-Specific Effects of Endophytic Bacteria in Helianthus tuberosus Exposed to Cd and Zn
Source: PubMed Central journal article supplement (PMC5666708; doi:10.3390/ijms18102026), 2017-09-21
Supplement: ijms-18-02026-s001.pdf [file ijms-18-02026-s001.pdf]

**Table S1.** Macro-nutrient concentration ( $\text{g} \cdot 100\text{g}^{-1}$  dry matter) in aerial part and roots of two cultivars of *H. tuberosus* grown in absence (control) and presence of Zn (1 mM)

|               |    | Control        | Zn (1mM)        |                         |                            |                            |
|---------------|----|----------------|-----------------|-------------------------|----------------------------|----------------------------|
|               |    |                | Non-inoculated  | <i>Serratia</i> sp. 246 | <i>Pseudomonas</i> sp. 256 | <i>Pseudomonas</i> sp. 228 |
| <b>Aerial</b> |    |                |                 |                         |                            |                            |
| VR            | Ca | 2.8 ± 0.5 c    | 1.8 ± 0.2 abc   | 1.6 ± 0.18 abc          | 1.5 ± 0.2 ab               | 1.7 ± 0.3 abc              |
|               | K  | 5.7 ± 0.8 b    | 4.1 ± 0.7 a     | 3.0 ± 0.5 a             | 2.8 ± 0.3 a                | 2.7 ± 0.4 a                |
|               | Mg | 0.7 ± 0.1 c    | 0.52 ± 0.05 abc | 0.49 ± 0.09 abc         | 0.40 ± 0.05 ab             | 0.45 ± 0.09 ab             |
|               | Na | 0.09 ± 0.03 b  | 0.06 ± 0.01 a   | 0.09 ± 0.02 ab          | 0.09 ± 0.01 ab             | 0.09 ± 0.01 ab             |
| D19           | Ca | 2.5 ± 0.5 bc   | 1.5 ± 0.3 ab    | 1.2 ± 0.4 a             | 1.3 ± 0.4 a                | 1.2 ± 0.3 a                |
|               | K  | 4.0 ± 0.5 b    | 2.9 ± 0.5 a     | 2.7 ± 0.4 a             | 2.7 ± 0.2 a                | 2.8 ± 0.19 a               |
|               | Mg | 0.8 ± 0.1 bc   | 0.36 ± 0.09 a   | 0.33 ± 0.06 a           | 0.37 ± 0.07 a              | 0.42 ± 0.06 ab             |
|               | Na | 0.09 ± 0.01 ab | 0.08 ± 0.01 ab  | 0.07 ± 0.01 ab          | 0.04 ± 0.01 a              | 0.05 ± 0.01 a              |
| <b>Root</b>   |    |                |                 |                         |                            |                            |
| VR            | Ca | 0.04 ± 0.01 a  | 0.6 ± 0.2 ab    | 0.22 ± 0.02 ab          | 0.30 ± 0.05 b              | 0.24 ± 0.04 ab             |
|               | K  | 1.5 ± 0.5 ns   | 1.8 ± 0.4       | 1.50 ± 0.07             | 1.4 ± 0.1                  | 1.5 ± 0.1                  |
|               | Mg | 0.29 ± 0.04 ns | 0.4 ± 0.07      | 0.15 ± 0.02             | 0.16 ± 0.03                | 0.15 ± 0.02                |
|               | Na | 0.21 ± 0.04 ab | 0.36 ± 0.02 b   | 0.10 ± 0.01 a           | 0.11 ± 0.01 a              | 0.12 ± 0.01 a              |
| D19           | Ca | 0.11 ± 0.02 ab | 0.58 ± 0.19 c   | 0.23 ± 0.03 ab          | 0.19 ± 0.05 ab             | 0.08 ± 0.04 a              |
|               | K  | 1.6 ± 0.5 ns   | 2.3 ± 0.5       | 1.3 ± 0.2               | 1.4 ± 0.1                  | 1.9 ± 0.6                  |
|               | Mg | 0.3 ± 0.1 ns   | 0.13 ± 0.04     | 0.16 ± 0.02             | 0.15 ± 0.02                | 0.14 ± 0.05                |
|               | Na | 0.16 ± 0.04 ab | 0.16 ± 0.05 ab  | 0.12 ± 0.01 a           | 0.12 ± 0.02 a              | 0.09 ± 0.03 a              |

Different letters represent significant differences per row and cultivar, after Tukey's test,  $p < 0.05$ ; mean values ± SE; n=4. ns: not significant.

**Table S2.** Macro-nutrient concentration ( $\text{g} \cdot 100\text{g}^{-1}$  dry matter) in aerial part and roots of two cultivars of *H. tuberosus* grown in absence (control) and presence of Cd (0.1mM).

|               |    | Control          | Cd (0.1mM)       |                            |                            |                         |                            |
|---------------|----|------------------|------------------|----------------------------|----------------------------|-------------------------|----------------------------|
|               |    |                  | Non-inoculated   | <i>Athrobacter</i> sp. 222 | <i>Pseudomonas</i> sp. 228 | <i>Serratia</i> sp. 246 | <i>Pseudomonas</i> sp. 262 |
| <b>Aerial</b> |    |                  |                  |                            |                            |                         |                            |
| VR            | Ca | 2.7 ± 0.1 d      | 1.9 ± 0.5 bc     | 1.2 ± 0.1 ab               | 0.9 ± 0.1 ab               | 0.6 ± 0.1 ab            | 1.1 ± 0.1 ab               |
|               | K  | 13 ± 1 d         | 12.9 ± 0.4 d     | 9 ± 1 bc                   | 5 ± 1 a                    | 3.8 ± 0.2 a             | 8 ± 1 b                    |
|               | Mg | 0.65 ± 0.04 cd   | 0.57 ± 0.04 abc  | 0.56 ± 0.06 abc            | 0.37 ± 0.07 a              | 0.44 ± 0.06 ab          | 0.60 ± 0.07 bcd            |
|               | Na | 0.014 ± 0.003 a  | 0.031 ± 0.008 ab | 0.05 ± 0.01 ab             | 0.017 ± 0.003 a            | 0.029 ± 0.008 a         | 0.05 ± 0.01 ab             |
| D19           | Ca | 2.4 ± 0.6 cd     | 1.4 ± 0.5 abc    | 1.1 ± 0.3 ab               | 1.1 ± 0.1 ab               | 1.6 ± 0.2 abc           | 0.7 ± 0.1 a                |
|               | K  | 11 ± 1 cd        | 7 ± 2 ab         | 7 ± 2 bc                   | 8 ± 1 b                    | 8.2 ± 0.3 bc            | 5 ± 1 a                    |
|               | Mg | 0.79 ± 0.09 d    | 0.53 ± 0.09 abc  | 1.1 ± 0.1 abc              | 1.10 ± 0.02 abc            | 1.6 ± 0.06 cd           | 0.53 ± 0.09 abc            |
|               | Na | 0.027 ± 0.007 ab | 0.042 ± 0.009 ab | 0.04 ± 0.01 bc             | 0.04 ± 0.01 ab             | 0.08 ± 0.02 c           | 0.032 ± 0.008 ab           |
| <b>Root</b>   |    |                  |                  |                            |                            |                         |                            |
| VR            | Ca | 0.38 ± 0.04 ab   | 0.4 ± 0.1 abc    | 0.29 ± 0.05 a              | 0.58 ± 0.03 bc             | 0.4 ± 0.1 abc           | 0.5 ± 0.1 c                |
|               | K  | 7 ± 1 a          | 5 ± 1 bc         | 3 ± 1 ab                   | 5 ± 1 abc                  | 4 ± 1 ab                | 3 ± 1 a                    |
|               | Mg | 0.29 ± 0.05 ab   | 0.17 ± 0.03 ab   | 0.17 ± 0.02 ab             | 0.24 ± 0.01 ab             | 0.17 ± 0.02 ab          | 0.23 ± 0.02 ab             |
|               | Na | 0.06 ± 0.01 ab   | 0.1 ± 0.01 ab    | 0.16 ± 0.05 ab             | 0.08 ± 0.02 ab             | 0.072 ± 0.003 ab        | 0.09 ± 0.01 ab             |
| D19           | Ca | 0.37 ± 0.04 ab   | 0.6 ± 0.2 bc     | 0.46 ± 0.03 abc            | 0.6 ± 0.1 bc               | 0.6 ± 0.1 bc            | 0.6 ± 0.1 bc               |
|               | K  | 4 ± 1 ab         | 4 ± 1 ab         | 3 ± 1 ab                   | 3 ± 1 ab                   | 3 ± 1 ab                | 2.5 ± 0.6 a                |
|               | Mg | 0.15 ± 0.04 b    | 0.15 ± 0.03 a    | 0.15 ± 0.01 a              | 0.21 ± 0.05 ab             | 0.2 ± 0.02 ab           | 0.15 ± 0.03 a              |
|               | Na | 0.15 ± 0.04 b    | 0.099 ± 0.004 ab | 0.07 ± 0.01 a              | 0.09 ± 0.01 ab             | 0.09 ± 0.02 ab          | 0.08 ± 0.01 ab             |

Different letters represent significant differences per row and cultivar, after Tukey's test,  $p < 0.05$ ; mean values ± SE; n=4. ns: not significant.

**Table S3.** Micro-nutrient concentration (mg.kg<sup>-1</sup> dry matter) in aerial part and roots of two cultivars of *H. tuberosus* grown in absence (control) and presence of Zn (1 mM)

|               |    | <b>Zn (1mM)</b> |                 |                         |                            |                            |
|---------------|----|-----------------|-----------------|-------------------------|----------------------------|----------------------------|
|               |    | Control         | Non-inoculated  | <i>Serratia</i> sp. 246 | <i>Pseudomonas</i> sp. 256 | <i>Pseudomonas</i> sp. 228 |
| <b>Aerial</b> |    |                 |                 |                         |                            |                            |
| VR            | Cu | 13.8 ± 1.6 abc  | 17.5 ± 1.3 c    | 14.1 ± 1.8 abc          | 14.1 ± 1.3 abc             | 17.3 ± 1.9 c               |
|               | Fe | 194.1 ± 23.0 e  | 89.2 ± 12.6 bc  | 148.4 ± 13.7 d          | 130.5 ± 26.7 cd            | 82.8 ± 25.1 abc            |
|               | Mn | 11.3 ± 1.7 abc  | 14.3 ± 2.8 abc  | 10.8 ± 0.7 ab           | 8.5 ± 1.0 a                | 16.6 ± 6.1 abc             |
| D19           | Cu | 16.8 ± 2.8 bc   | 10.4 ± 1.4 a    | 10.6 ± 0.6 ab           | 13.4 ± 2.0 abc             | 10.4 ± 4.1 a               |
|               | Fe | 145.1 ± 13.8 a  | 80.2 ± 11.2 abc | 44.5 ± 13.6 ab          | 35.5 ± 6.8 a               | 67.3 ± 8.3 ab              |
|               | Mn | 44.5 ± 4.0 d    | 15.7 ± 3.1 abc  | 16.7 ± 6.3 abc          | 21.1 ± 5.8 bc              | 22.6 ± 5.3 c               |
| <b>Root</b>   |    |                 |                 |                         |                            |                            |
| VR            | Cu | 17.3 ± 5.3 ab   | 18.9 ± 2.6 c    | 9.8 ± 0.3 ab            | 12.4 ± 2.6 b               | 11.4 ± 0.6 ab              |
|               | Fe | 118.0 ± 36.4 ab | 102.2 ± 18.9 ab | 91.9 ± 7.8 ab           | 83.3 ± 5.9 ab              | 83.2 ± 8.1 ab              |
|               | Mn | 2.2 ± 0.2 a     | 2.4 ± 0.1 ab    | 1.79 ± 0.05 ab          | 1.6 ± 0.1 a                | 1.8 ± 0.3 ab               |
| D19           | Cu | 10.4 ± 1.5 ab   | 10.6 ± 3.0 ab   | 9.3 ± 3.0 ab            | 13.5 ± 2.6 b               | 6.8 ± 1.1 a                |
|               | Fe | 141.5 ± 27.1 b  | 113.6 ± 21.7 b  | 71.5 ± 6.7 a            | 63.4 ± 6.7 a               | 62.4 ± 11.3 a              |
|               | Mn | 6.1 ± 0.7 c     | 4.5 ± 1.3 bc    | 2.8 ± 0.2 ab            | 3.0 ± 0.5 b                | 3.3 ± 0.1 ab               |

Different letters represent significant differences per row and cultivar, after Tukey's test,  $p < 0.05$ ; mean values ± SE; n=4

**Table S4.** Micro-nutrient concentration (mg.kg<sup>-1</sup> dry matter) in aerial part and roots of two cultivars of *H. tuberosus* grown in absence (control) and presence of Cd (0.1mM).

|               |    | <b>Cd (0.1mM)</b> |                  |                            |                            |                         |                            |
|---------------|----|-------------------|------------------|----------------------------|----------------------------|-------------------------|----------------------------|
|               |    | Control           | Non-inoculated   | <i>Athrobacter</i> sp. 222 | <i>Pseudomonas</i> sp. 228 | <i>Serratia</i> sp. 246 | <i>Pseudomonas</i> sp. 262 |
| <b>Aerial</b> |    |                   |                  |                            |                            |                         |                            |
| VR            | Cu | 7.4 ± 1.0 abc     | 8.0 ± 2.0 abc    | 3.0 ± 1.0 a                | 3.5 ± 0.3 ab               | 8.0 ± 0.9 abc           | 8.8 ± 1.3 bc               |
|               | Fe | 65.9 ± 8.7 de     | 33.2 ± 10.3 abcd | 11.6 ± 7.1 a               | 25.0 ± 4.7 abc             | 20.7 ± 7.0 ab           | 48.1 ± 9.0 abcd            |
|               | Mn | 11.8 ± 1.1 c      | 3.2 ± 0.4 ab     | 2.4 ± 0.6 a                | 1.5 ± 0.4 a                | 1.5 ± 0.6 a             | 8.0 ± 2.1 b                |
| D19           | Cu | 10.5 ± 2.3 c      | 9.4 ± 1.4 c      | 5.1 ± 0.8 abc              | 8.2 ± 1.6 abc              | 6.6 ± 1.2 abc           | 10.2 ± 3.3 c               |
|               | Fe | 93.2 ± 16.9 e     | 48.7 ± 10.1 bcd  | 41.4 ± 7.7 abcd            | 32.0 ± 6.7 abcd            | 52.3 ± 12.8 cd          | 47.4 ± 9.4 bcd             |
|               | Mn | 12.5 ± 2.1 c      | 3.8 ± 0.5 ab     | 1.3 ± 0.3 a                | 1.1 ± 0.3 a                | 2.6 ± 0.2 a             | 1.5 ± 0.4 a                |
| <b>Root</b>   |    |                   |                  |                            |                            |                         |                            |
| VR            | Cu | 14.8 ± 1.3 bc     | 19.5 ± 4.3 c     | 4.4 ± 1.4 a                | 17.1 ± 2.6 bc              | 11.3 ± 5.8 ab           | 9.8 ± 0.8 ab               |
|               | Fe | 193.8 ± 46.9 c    | 62.4 ± 13.7 b    | 63.2 ± 2.1 b               | 65.6 ± 13.2 b              | 60.0 ± 25.4 b           | 68.8 ± 16.4 b              |
|               | Mn | 3.4 ± 0.9 c       | 0.9 ± 0.3 a      | 1.0 ± 0.2 ab               | 2.6 ± 0.6 abc              | 1.0 ± 0.1 ab            | 3.2 ± 0.7 bc               |
| D19           | Cu | 10.2 ± 1.4 ab     | 10.3 ± 3.1 ab    | 5.5 ± 0.8 a                | 10.1 ± 3.1 ab              | 10.8 ± 1.6 ab           | 3.0 ± 1.1 a                |
|               | Fe | 154.8 ± 49.6 c    | 34.3 ± 7.6 ab    | 47.3 ± 5.7 ab              | 68.7 ± 19.0 ab             | 52.7 ± 12.2 ab          | 10.1 ± 0.8 a               |
|               | Mn | 2.7 ± 0.7 abc     | 1.5 ± 0.7 abc    | 1.9 ± 0.4 abc              | 2.2 ± 1.0 abc              | 0.5 ± 0.2 a             | 1.1 ± 0.4 ab               |

Different letters represent significant differences per row and cultivar, after Tukey's test,  $p < 0.05$ ; mean values ± SE; n=4
